# Supplementary material
Source: Springer Nature journal article supplement (https://www.springermedizin.de/resource/supplementary/12882_2013_652_MOESM2_ESM.pdf/9454030)

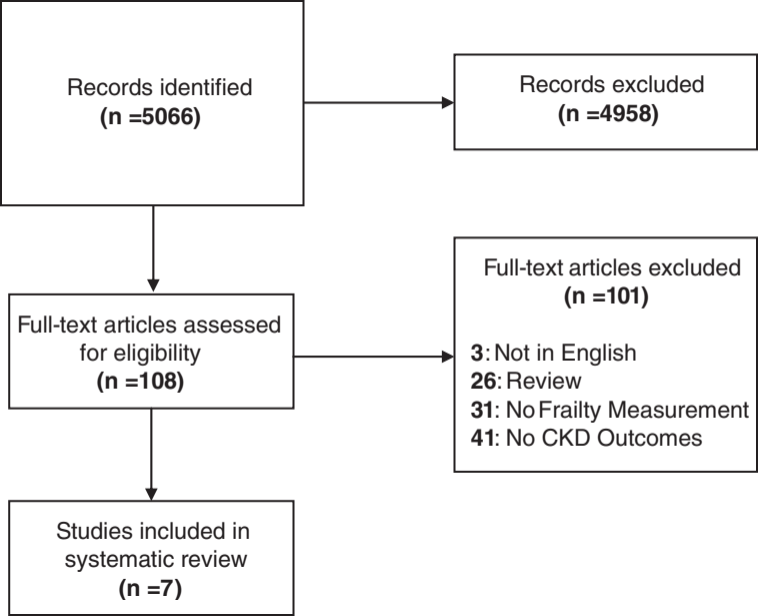

Supplement: MOESM2 [file 9454030]
